# Supplementary material for: Plasma-based digital PCR assay for early detection of gastric cancer using multiple methylation biomarkers
Source: Research Square preprint supplement (doi:10.21203/rs.3.rs-7579093/v1), 2025-10-22
Supplement: Supplementary file 1 [file 790408b78b27aa15e7a17ef6.pdf]

Supplementary Material

**Plasma-based digital PCR assay for early detection of gastric cancer using multiple methylation biomarkers**

Yun Young Lee, Joon An, Jinil Han, Youngho Moon, and Sang-Il Lee

**Table of Contents**

|                              |   |
|------------------------------|---|
| SUPPLEMENTARY TABLES .....   | 2 |
| SUPPLEMENTARY FIGURES.....   | 4 |
| DIGITAL MIQE CHECKLIST ..... | 6 |

## SUPPLEMENTARY TABLES

**Supplementary Table S1.** Patient demographics and clinical characteristics for tissue-based validation

| Characteristics                        | Gastric Cancer <sup>a</sup> | Colorectal Cancer <sup>b</sup> |
|----------------------------------------|-----------------------------|--------------------------------|
| Total, <i>N</i>                        | 40                          | 37                             |
| Sex, <i>N</i> (%)                      |                             |                                |
| Male                                   | 24 (60.0)                   | 20 (54.1)                      |
| Female                                 | 16 (40.0)                   | 17 (45.9)                      |
| Age (years) - Median (range)           | 75.5 (49.0-90.0)            | 66.0 (43.0-97.0)               |
| Stage, <i>N</i> (%)                    |                             |                                |
| I                                      | 15 (37.5)                   | 14 (37.8)                      |
| II                                     | 15 (37.5)                   | 6 (16.2)                       |
| III                                    | 10 (25.0)                   | 15 (40.6)                      |
| IV                                     | 0 (0.0)                     | 2 (5.4)                        |
| Lauren's Classification, <i>N</i> (%)  |                             |                                |
| Intestinal Type                        | 27 (67.5)                   | -                              |
| Diffuse Type                           | 6 (15.0)                    | -                              |
| Mixed Type                             | 5 (12.5)                    | -                              |
| Unknown                                | 2 (5.0)                     | -                              |
| Grade of Differentiation, <i>N</i> (%) |                             |                                |
| Well                                   | 5 (12.5)                    | -                              |
| Moderate                               | 22 (55.0)                   | -                              |
| Poor                                   | 11 (27.5)                   | -                              |
| Unknown                                | 2 (5.0)                     | -                              |

<sup>a</sup> Tissue obtained from the Chonnam National University Hwasun Hospital (Hwasun, Republic of Korea).

<sup>b</sup> Tissue obtained from the Ajou University Hospital (Suwon, Republic of Korea).

**Supplementary Table S2.** Target regions and biological functions of selected biomarker candidates

| <b>DNA Methylation Biomarker</b>            | <b>Biological Role</b>           | <b>Genomic Coordinates <sup>a</sup></b> |
|---------------------------------------------|----------------------------------|-----------------------------------------|
| <i>GHR</i><br>(Growth Hormone Receptor)     | Growth Hormone Receptor Activity | Chr5:42423946-42424524                  |
| <i>GLRB</i><br>(Glycine Receptor Beta)      | Chloride Transport               | Chr4:157997359-157997749                |
| <i>GATM</i><br>(Glycine Amidinotransferase) | Creatine Biosynthesis            | Chr15:45670525-45671027                 |

<sup>a</sup>GRCh37/hg19 assembly

## SUPPLEMENTARY FIGURES

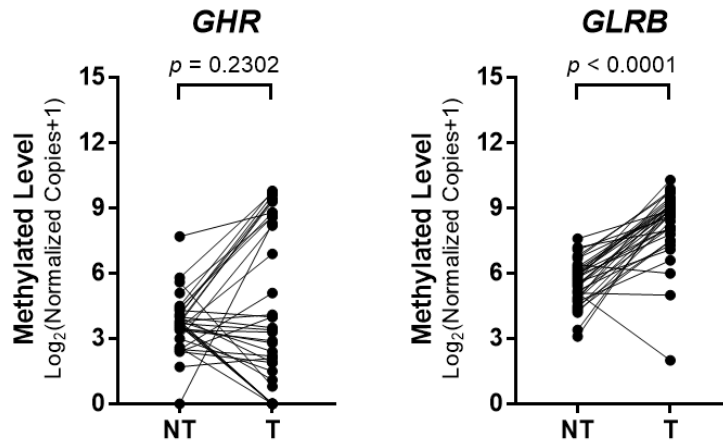

**Supplementary Fig. S1.** DNA methylation status of *GHR* and *GLRB* in colorectal cancer tissues. Methylation levels of *GHR* and *GLRB* were analyzed in primary tumor tissues (T) and matched adjacent non-cancerous tissues (NT) from 37 colorectal cancer patients. Paired samples from the same patient are connected by lines. Statistical differences were evaluated using a paired *t*-test.

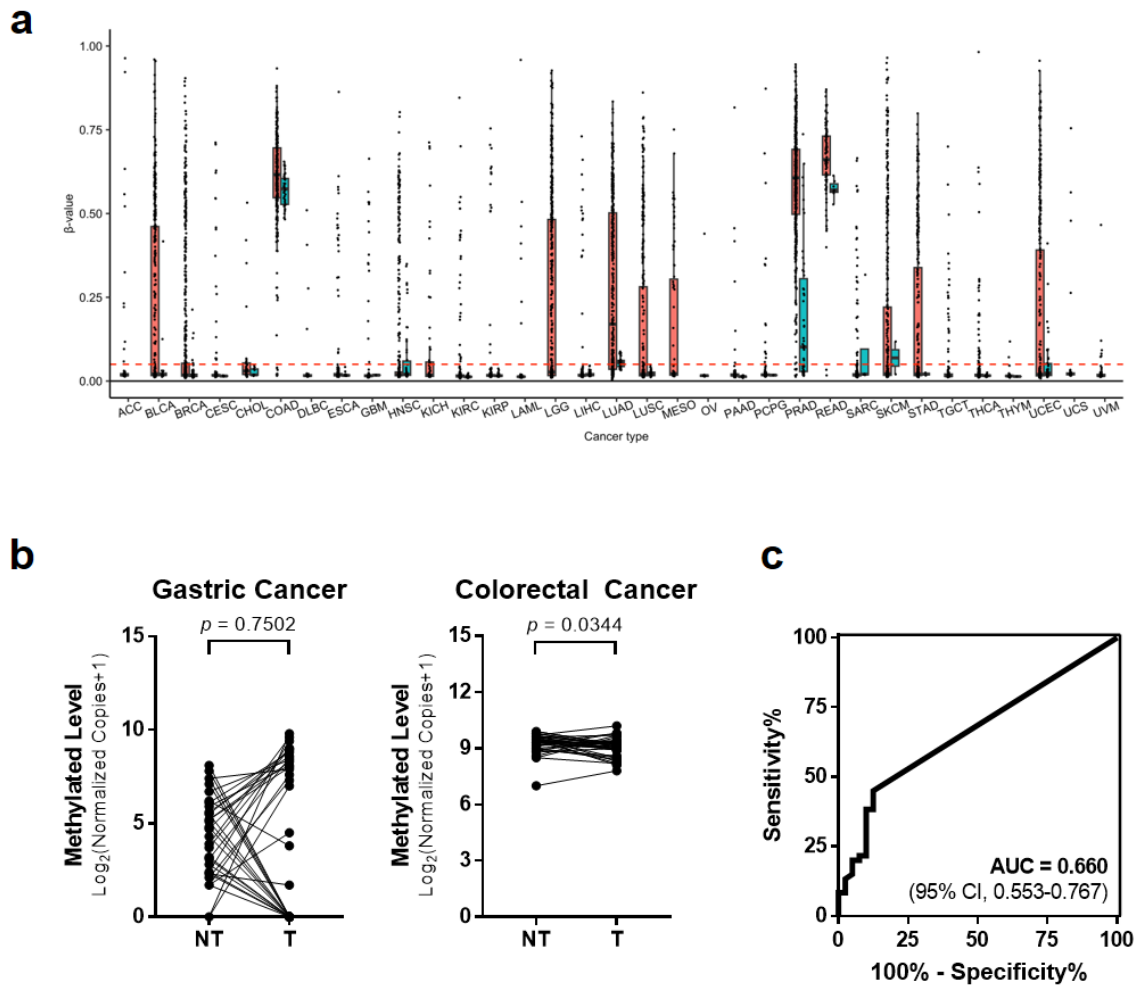

**Supplementary Fig. S2.** *GATM* methylation as a novel tissue-specific biomarker for colon and rectum. **(a)** DNA methylation levels of *GATM* across 33 cancer types and corresponding normal tissues. ( $\beta$ -values represent the methylation level, ranging from 0 to 1). **(b)** DNA methylation levels of *GATM* in primary tumor tissues (T) and matched adjacent non-cancerous tissues (NT) from 40 gastric cancer (GC) patients and 37 colorectal cancer (CRC) patients. Paired samples from the same patient are connected by lines. Statistical differences were evaluated using a paired *t*-test. **(c)** Receiver operating characteristic (ROC) curve for *GATM* in distinguishing GC patients from non-GC subjects based on plasma specimens, with area under the curve (AUC) values and 95% confidence intervals (CIs) shown.

## DIGITAL MIQE CHECKLIST

| Item to Check                                                                                              | Provided | Comment                                                                           |
|------------------------------------------------------------------------------------------------------------|----------|-----------------------------------------------------------------------------------|
| <b>1. SPECIMEN</b>                                                                                         |          |                                                                                   |
| Detailed description of specimen type and numbers                                                          | Y        | Explained in <b>Methods</b> , <b>Table 1</b> , and <b>Supplemental Table S1</b>   |
| Sampling procedure (including time to storage)                                                             | Y        | Explained in <b>Methods</b>                                                       |
| Sample aliquotation, storage conditions and duration                                                       | Y        | Explained in <b>Methods</b>                                                       |
| <b>2. NUCLEIC ACID EXTRACTION</b>                                                                          |          |                                                                                   |
| Description of extraction method including amount of sample processed                                      | Y        | Explained in <b>Methods</b>                                                       |
| Volume of solvent used to elute/resuspend extract                                                          | Y        | Explained in <b>Methods</b>                                                       |
| Number of extraction replicates                                                                            | N        | Used up all of samples                                                            |
| Extraction blanks included?                                                                                | Y        | Explained in <b>Methods</b> (no-template control)                                 |
| <b>3. NUCLEIC ACID ASSESSMENT AND STORAGE</b>                                                              |          |                                                                                   |
| Method to evaluate quality of nucleic acids                                                                | Y        | Explained in <b>Methods</b> (DNA quantification using NanoDrop spectrophotometer) |
| Method to evaluate quantity of nucleic acids (including molecular weight and calculations when using mass) | Y        | Explained in <b>Methods</b> (DNA quantification using NanoDrop spectrophotometer) |
| Storage conditions: temperature, concentration, duration, buffer, aliquots                                 | Y        | Explained in <b>Methods</b>                                                       |
| Clear description of dilution steps used to prepare working DNA solution                                   | N        | Not explained in the manuscript, but all samples used up                          |
| <b>4. NUCLEIC ACID MODIFICATION</b>                                                                        |          |                                                                                   |
| Template modification (digestion, sonication, pre-amplification, bisulphite etc.)                          | Y        | Explained in <b>Methods</b> (bisulfite conversion)                                |
| Details of repurification following modification if performed                                              | Y        | Explained in <b>Methods</b> (according to manufacturer's instructions)            |
| <b>5. REVERSE TRANSCRIPTION</b>                                                                            |          |                                                                                   |
| cDNA priming method and concentration                                                                      | N        | Not applicable                                                                    |
| One or two step protocol (include reaction details for two step)                                           | N        | Not applicable                                                                    |
| Amount of RNA added per reaction                                                                           | N        | Not applicable                                                                    |
| Detailed reaction components and conditions                                                                | N        | Not applicable                                                                    |
| Estimated copies measured with and without addition of RT*                                                 | N        | Not applicable                                                                    |
| Manufacturer of reagents used with catalogue and lot numbers                                               | N        | Not applicable                                                                    |
| Storage of cDNA: temperature, concentration, duration, buffer and aliquots                                 | N        | Not applicable                                                                    |

|                                                                                                                |          |                                                                                          |
|----------------------------------------------------------------------------------------------------------------|----------|------------------------------------------------------------------------------------------|
| <b>6. dPCR OLIGONUCLEOTIDES DESIGN AND TARGET INFORMATION</b>                                                  |          |                                                                                          |
| Sequence accession number or official gene symbol                                                              | <b>Y</b> | Explained in <b>Supplementary Table S2</b>                                               |
| Method (software) used for design and <i>in silico</i> verification                                            | <b>N</b> | Not explained in the manuscript, but IDT website was utilized for <i>in silico</i> study |
| Location of amplicon                                                                                           | <b>Y</b> | Explained in <b>Supplementary Table S2</b>                                               |
| Amplicon length                                                                                                | <b>N</b> | Only provided amplicon regions in <b>Supplemental Table S2</b>                           |
| Primer and probe sequences (or amplicon context sequence)**                                                    | <b>Y</b> | Explained in <b>Supplemental Table S2</b> (amplicon context regions)                     |
| Location and identity of any modifications                                                                     | <b>N</b> | Not applicable                                                                           |
| Manufacturer of oligonucleotides                                                                               | <b>Y</b> | Explained in <b>Methods</b>                                                              |
| <b>7. dPCR PROTOCOL</b>                                                                                        |          |                                                                                          |
| Manufacturer of dPCR instrument and instrument model                                                           | <b>Y</b> | Explained in <b>Methods</b>                                                              |
| Buffer/kit manufacturer with catalogue and lot number                                                          | <b>Y</b> | Explained in <b>Methods</b>                                                              |
| Primer and probe concentration                                                                                 | <b>N</b> | Not explained in the manuscript, due to manufacturer's disclosure decision               |
| Pre-reaction volume and composition (incl. amount of template and if restriction enzyme added)                 | <b>N</b> | Not applicable                                                                           |
| Template treatment (initial heating or chemical denaturation)                                                  | <b>N</b> | Not applicable                                                                           |
| Polymerase identity and concentration, Mg++ and dNTP concentrations***                                         | <b>Y</b> | Explained in <b>Methods</b> (ddPCR master mix was provided by manufacturer)              |
| Complete thermocycling parameters                                                                              | <b>Y</b> | Explained in <b>Methods</b>                                                              |
| <b>8. ASSAY VALIDATION</b>                                                                                     |          |                                                                                          |
| Details of optimisation performed                                                                              | <b>Y</b> | Explained in <b>Methods</b>                                                              |
| Analytical specificity (vs. related sequences) and limit of blank (LOB)                                        | <b>N</b> | Not explained in the manuscript, but a no-template control was tested in all runs        |
| Analytical sensitivity/LoD and how this was evaluated                                                          | <b>N</b> | Not applicable                                                                           |
| Testing for inhibitors (from biological matrix/extraction)                                                     | <b>N</b> | Not applicable                                                                           |
| <b>9. DATA ANALYSIS</b>                                                                                        |          |                                                                                          |
| Description of dPCR experimental design                                                                        | <b>Y</b> | Explained in <b>Methods</b>                                                              |
| Comprehensive details negative and positive of controls (whether applied for QC or for estimation of error)    | <b>Y</b> | Explained in <b>Methods</b>                                                              |
| Partition classification method (thresholding)                                                                 | <b>Y</b> | Explained in <b>Methods</b>                                                              |
| Examples of positive and negative experimental results (including fluorescence plots in supplemental material) | <b>N</b> | Not explained in the manuscript, but plan to submit if required                          |

|                                                                                   |   |                                                                                                  |
|-----------------------------------------------------------------------------------|---|--------------------------------------------------------------------------------------------------|
| Description of technical replication                                              | N | Not applicable                                                                                   |
| Repeatability (intra-experiment variation)                                        | N | Not applicable                                                                                   |
| Reproducibility (inter-experiment/user/lab etc. variation )                       | N | Not applicable                                                                                   |
| Number of partitions measured (average and standard deviation )                   | Y | Not explained in the manuscript (Average $\pm$ SD, 18482.3 $\pm$ 2314.4 in the validation study) |
| Partition volume                                                                  | N | Not applicable                                                                                   |
| Copies per partition ( $\lambda$ or equivalent ) (average and standard deviation) | N | Not applicable                                                                                   |
| dPCR analysis program (source, version)                                           | Y | Explained in <b>Methods</b>                                                                      |
| Description of normalisation method                                               | Y | Explained in <b>Methods</b>                                                                      |
| Statistical methods used for analysis                                             | Y | Explained in <b>Methods</b>                                                                      |
| Data transparency                                                                 | Y | Available on request if corresponding author has given permission                                |
